# Supplementary material for: Exploring the key drivers of crop yields in Morocco – a systematic review
Source: Frontiers journal article supplement (doi:10.3389/fagro.2025.1515938), 2025-02-27
Supplement: Table_1.xlsx [file Table_1.xlsx]

## Sheet: TABLE S1
Supplementary Material
TABLE S1 A summary of reviewed articles, their year’s publication, journal, country of the lead author, review status, and crops of interest and respective drivers
References	Year of publication	Title of the paper	Publisher/Journal	Country of affiliation of lead author	Peer review / Grey	Crops	Drivers	Period of study
El-Shater and Yigezu, (2021)	2021	Can Retention of crop residues on the field be justified on socio-economic Grounds? A case study from the mixed crop-livestock Production systems of the Moroccan drylands	MDPI: Agronomy	Egypt	Peer review	Wheat	Conservation agriculture	2002-2011
El Ansari et al., (2020)	2020	Trade-Offs between Sustainability Indicators in Response to the Production Choices of Different Farm Household Types in Drylands	MDPI : Agronomy	France	Peer review	Vegetables ( Onions, Potatoes) Cereals ( Soft wheat and Barley) Legumes (chickpea and broad bean)	Irrigation, Nitrogen, Labour	2017-2020
Hossard et al., (2021)	2021	Assessing the resilience of farming systems on the Saïs plain, Morocco	Springer Nature: Regional Environmental Change	France	Peer review	All	Rainfall, Irrigation	1980-2010
Grasso and Feola, (2012)	2012	Mediterranean agriculture under climate change: adaptive capacity, adaptation, and ethics	Springer: Regional Environmental Change	Italy	Peer review	All	Adaptive capacity (Economic resources, technology, information and skills, infrastructure, institutions, and equity)	-
Yigezu et al., (2019)	2019	Legume-based rotations have clear economic advantages over cereal monocropping in dry areas	Springer: Agronomy for Sustainable Developmen	Egypt	Peer review	Wheat and Faba Beans	Rotation	2012/2013
Azzam and Sekkat, (2005)	2005	Measuring total-factor agricultural productivity under drought conditions: The case of Morocco	Taylor & Francis Group: The Journal of North African Studies	USA	Peer review	Cereals	Rainfall, Technical Efficiency	1980-1995
Bouras et al., (2020)	2020	Linkages between Rainfed Cereal Production and Agricultural Drought Through Remote Sensing Indices a Land Data Assimilation System: A case study in Morocco Agricultural Drought through Remote Sensing Indices and a Land Data Assimilation System: A Case Study in Morocco	MDPI: Remote Sensing	Morocco	Peer review	Wheat	Drought, Soil moisture	2000-2017
Benabdelouahab et al., (2021)	2021	Monitoring spatial variability and trends of wheat grain yield over the main cereal regions in Morocco: a remote-based tool for planning and adjusting policies	Taylor & Francis Group: Geocarto International	Morocco	Peer review	Wheat	Water shortage, Irrigation, Technology	2000-2016
Baccar et al., (2017)	2017	Shared environment, diversity of pathways: dynamics of family farming in the Saiss Plain (Morocco)	Springer: Regional Environmental Change	France	Peer review	Faba beans, chickpeas, lentils, oat, Barley, Vegetables and Fruits	Water stress, Land, Capital	2013-2015
Ait houssa et al., (2016)	2016	Eléments agro-économiques pour réussir la culture du blé Tendre en Bour	Bulletin de Transfert de technologie en Agriculture	Morocco	Grey	Soft Wheat	Rainfall, Soil type, Irrigation, Fertilizer, Rotation	2004-2006/2008-2009
Bouras et al., (2019)	2019	Assessing the impact of global climate changes on irrigated wheat yields and water requirements in a semi-arid environment of Morocco	Nature: Scientific reports	Morocco	Peer review	Wheat	Rainfall, Temperature, CO2, Water stress	1991-2010
Mourad et al., (2017)	2017	Modelling the impact of climate change on cereal yield in Morocco	International Journal of Environment, Agriculture and Biotechnology	Morocco	Peer review	Cereals	Rainfall, Temperature, Storm	1980-2016
Lehmann et al., (2020)	2020	Potential for Early Forecast of Moroccan Wheat Yields Based on Climatic Drivers	Advancing Earth and Space Science: Geophysical Research Letters	Germany	Peer review	Wheat	Rainfall, See surface temperature	1981-2017
John Ryan et al., (2009)	2009	Nitrogen in Rainfed and Irrigated Cropping Systems in the Mediterranean Region	Elsevier: Advances in Agronomy	Syria	Peer review	Cereals	Rainfall, Fertilizer	-
J. Ryan et al., (2009)	2009	Nitrogen Fertilizer Response of Some Barley Varieties in Semi-Arid Conditions in Morocco	Journal of Agricultural Science and Technology	Syria	Peer review	Barley	Fertilizer	-
Yigezu et al., (2021b)	2021	Can an incremental approach be a better option in the dissemination of conservation agriculture? Some socioeconomic justifications from the drylands of Morocco	Elsevier: Soil & Tillage Research journal	Egypt	Peer review	Wheat	Conservation agriculture	2013
Bouazzama et al., (2012)	2012	Effect of water stress on growth, water consumption and yield of silage maize under flood irrigation in a semi-arid climate of Tadla (Morocco)	Biotechnology, Agronomy, Society and Environment	Belgium	Peer review	Sillage Maize	Irrigation	2009-2010
Reynolds, (2010)	2010	Climate Change and Crop Production	CABI Climate Change Series Climate	Mexico	Grey	Wheat	Rainfall, Temperature, Pest	-
Fakhouri et al., (2021)	2021	Population Dynamics and Yield Loss Assessment for Pea Aphid, Acyrthosiphon pisum (Harris) (Homoptera: Aphididae), on Lentil in Morocco	MDPI: Insects	Morocco	Peer review	Lentil	Insects	2015-2018
Magnan et al., (2011a)	2011	Modeling the limitations and implicit costs of cereal self-sufficiency: the case of Morocco	Springer: Food Security	USA	Peer review	Cereals ( Wheat, Barley, Rice ) Legumes ( beans, lentil, oroble, peas, chickpea ) Forage ( oats, corn, sorghum )	Self sufficiency	2008-2022
Kuzmanović et al., (2018)	2018	Yield of chromosomally engineered durum wheat-Thinopyrum ponticum recombinant lines in a range of contrasting rainfed environments	Elsevier: Field Crops Research	Italy	Peer review	Durum Wheat	Genetics	2013-2015
El Hassouni et al., (2018)	2018	Root System Architecture and Its Association with Yield under Different Water Regimes in Durum Wheat	Crop Science society of America: Crop Science	Morocco;	Peer review	Durum Wheat	Genetics	2014-2016
Taaime et al., (2022)	2022	Early Sowing of Quinoa Cultivars, Benefits from Rainy Season and Enhances Quinoa Development, Growth, and Yield under Arid Condition in Morocco	MDPI : Sustainability	Morocco	Peer review	Quinoa	Rainfall, Temperature, Radiation, Photoperiod	2020-2021
Hirich et al., (2012)	2012	Could Quinoa be an Alternative Crop of Wheat in the Mediterranean Region: Case of Morocco?	Les notes d’alerte du CIHEAM	Morocco	Grey	Quinoa	Rainfall, Temperature, Photoperiod, Soil, Water quality, Sowing date	2009-2012
Schilling et al., (2012)	2012	Climate change, vulnerability, and adaptation in North Africa with focus on Morocco	Elsevier: Agriculture, Ecosystems and Environment	Germany	Peer review	Wheat and Barley	Rainfall, Irrigation, Human developement	1978-2008
De Wit et al. (2013)	2013	Building an operational	2nd International Conference on Agro-Geoinformatics 2013: Information for Sustainable Agriculture, Agro-Geoinformatics 2013	The Netherlands	Grey	Durum and Soft Wheat	Rainfall, Soil water balance, Evapotranspiration	1999-2010
		system for crop monitoring and yield forecasting in Morocco
Duchemin et al., (2006)	2006	Monitoring wheat phenology and irrigation in Central Morocco: On the use of relationships between evapotranspiration, crops coefficients, leaf area index and remotely sensed vegetation indices	Elsevier: Agricultural Water Management	France	Peer review	Wheat	Irrigation, Evapotranspiration	2002-2003
Heng et al., (2007)	2007	Optimizing wheat productivity in two rainfed environments of the West Asia–North Africa region using a simulation model	Elsevier: European journal of agronomy	Austria	Peer review	Wheat	Rainfall, Soil type, Fertilizer, Soil moisture storage, Sowing date, Supplemental irrigation	1999-2002
Hadria et al., (2007)	2007	Calibration and validation of the stics crop model for managing wheat irrigation in the semi-arid marrakech/al haouz plain	HAL: Arabian Journal for Science and Engineering	Morocco	Peer review	Wheat	Irrigation, Fertilizer, Sowing date	1982-2001
Belaqziz et al., (2021)	2021	Optimizing the Sowing Date to Improve Water Management and Wheat Yield in a Large Irrigation Scheme, through a Remote	MDPI: Remote sensing	Morocco	Peer review	Wheat	Sowing date	2011-2012
		Sensing and an Evolution Strategy-Based Approach
Srairi, (2021)	2021	Rethinking the agricultural development model in Morocco in the post Covid-19 era	Cahiers Agricultures	Morocco	Grey	Wheat, barley	Rainfall, Irrigation, Low income, No social insurance, low mechanization, Farmers's training	2020
Sraïri, (2018)	2018	Water uses in sustainable agriculture practices: reconsidering the priorities in water scarce areas	MedCrave Online: Advances in Plants & Agriculture Research	Morocco	Peer review	Cereals	Rainfall	-
Sraïri, (2017)	2017	New challenges for the moroccan agricultural sector to cope with local and global changes	Nova Science Publishers	Morocco	Grey	Cereals, Olives	Rainfall, Drought, Lack of public aids and research efforts, Poverty and low human development, Groundwater depletion	-
Baccar et al., (2019)	2019	The determining factors of farm sustainability in a context of growing agricultural intensification	Taylor & Francis: Agroecology and Sustainable Food Systems	France	Peer review	All	Irrigation, Mechanization	2012-2013
Bouazza et al., (2002)	2002	Vulnérabilité et adaptation du secteur irrigue du Maroc face aux impacts des changements climatiques	International Conference organised in AGADIR by ANAFID	Morocco	Grey	Wheat, maize, sunflower, alfalfa	Rainfall, Temperature, CO2, Lightening, Irrigation, Sowing date	2001-2020
Zaouaq, (2021)	2021	Traditional knowledge in Morocco: a lever for adaptation to climate change in agriculture	Journal d’Economie, de Management, d’Environnement et de Droit (JEMED)	Morocco	Peer review	Barley, wheat	Rainfall, Traditional knowledge of farmers	-
ADA, (2012)	2012	Evaluation Environnementale Stratégique du Plan Maroc Vert	Agence pour le développement agricole	Morocco	Grey	Cereals and legumes	Rainfall, Temperature, CO2, Technical efficiency	1976-2006
Harbouze et al., (2019)	2019	Rapport de synthèse sur l’agriculture au Maroc	HAL : Open science	France	Peer review	Wheat	Rainfall, Temperature, Soil Fertility, Poverty, Smal farm	-
Aziz and Elquaoumi, (2016)	2016	Analyse des stratégies d’adaptations des agriculteurs de Skoura (Ouarzazate) aux changements climatiques	Alternatives Rurales	Morocco	Grey	Wheat and barley	Rainfall, Temperature, Soil salinity, Desertification, Groundwater uptakes, Agronomic materials	2014-2015
Balaghi et al. (2008)	2008	Empirical regression models using NDVI, rainfall and temperature data for the early prediction of wheat grain yields in Morocco	Elsevier: International Journal of Applied Earth Observation and Geoinformation	Morocco	Peer review	Wheat	Rainfall, Temperature, Hot winds, Soil, Insects and diseases	1990-2004
Et-Tayeb et al., (2022)	2022	Tillage, Residues Management, and Nitrogen Fertilization Effects on Soil Organic Status, Soil Quality, and Soft Wheat in the Moroccan Semi-Arid	Ecological Engineering & Environmental Technology	Morocco	Peer review	Soft wheat	Fertilizer, Conservation agriculture	2010-2020
Aboutayeb et al. (2020)	2020	Impact of No-Till on physicochemical properties of Vertisols in Chaouia region of Morocco	Federation of Eurasian Soil Science Societies: Eurasian Journal of Soil Science	Morocco	Peer review	Wheat, Barley, Maize and lentils	No-tillage	2016
Tafoughalti, (2018)	2018	Wheat yield vulnerability: relation to rainfall and suggestions for adaptation	Journal of degraded and mining lands management	Morocco	Peer review	Wheat	Rainfall, Soil fertility, Knowledge or awareness of farmers	1995-2015
El Mekkaoui et al., (2021)	2021	The conservation agriculture in northwest of Morocco (Merchouch area): The impact of no-till systems on physical properties of soils in semi-arid climate	EDP Sciences: E3S Web of Conferences	Morocco	Peer review	Legumes (lentils, chickpeas...) Cereals (soft wheat, durum wheat...)	No-tillage	2005-2018
Mrabet et al., (2001)	2001	soil chemical quality changes and implications for fertilizer management after 11 years of no tillage wheat production systems in semi-arid Morocco	John Wiley & Sons: Land degradation and development	Morocco	Peer review	Wheat	No-tillage	1987-1998
Douguedroit et al. (1998)	1998	Précipitations et rendements du blé dur et de l'orge en culture «Bour» dans le Maroc du Centre-ouest	Persee: Méditerranée N° 1	France	Grey	wheat and barley	Rainfall	1979-1993
Jarlan et al., (2013)	2013	Linkages between common wheat yields and climate in Morocco (1982–2008)	Springer: International Journal of Biometeorology	France	Peer review	Wheat	Rainfall, Temperature,Sea surface temperature, The North Atlantic Oscillation (NAO), The Scandinavian Pattern (SCA)	1982-2008
Abderrazzak et al., (2009)	2009	Effet de l’irrigation supplémentaire et du génotype sur la production du blé tendre et l’efficience d’utilisation de l’eau dans la région du Saïs	Symposium international « Agriculture durable en région Méditerranéenne (AGDUMED)»	Morocco	Grey	Wheat	Irrigation	2007-2008
Abderrazzak, (2013)	2013	Effects of Supplemental Irrigation and Nitrogen Applied on Yield and Yield Components of Bread Wheat at the Saïs Region of Morocco	Science domain international: American Journal of Experimental Agriculture	Morocco	Peer review	Bread wheat	Irrigation, Fertilizer	2007-2009
Zeggaf et al., (2002)	2002	Caractérisation de la variabilité spatiale du climat Marocain en relation avec la productivité des céréales à petites graines	ANAFIDE	Morocco	Grey	Wheat and Barley	Rainfall, Temperature, Supplemental irrigation, Variety, Evapotranspiration	1960-1990
Requier-Desjardins, (2010)	2010	Impacts des changements climatiques sur l’agriculture au Maroc et en Tunisie et priorités d’adaptation	Les Notes d’analyse du CIHEAM	France	Grey	Rainfed crops	Rainfall, Technical Efficiency	-
Pala et al., (2011)	2011	Assessment of wheat yield gap in the Mediterranean: Case studies from Morocco, Syria, and Turkey	ICARDA	Syria	Grey	Wheat	Rainfall, Land fragmentation, technical efficiency, Irrigation, Variety	1990-2000
Daroui et al., (2011)	2011	Effet de l’irrigation d’appoint sur le rendement d’une culture de blé tendre (Triticum aestivum L.) (Variété Rajae) au Maroc Oriental	Nature & Technologie	Morocco	Peer reviiew	Soft Wheat	Irrigation	2007-2008
Karrou, (1996)	1996	Variation génotypique de I'efficience d'utilisation de l'azote chez le blé tendre	Al awamia	Morocco	Grey	Soft Wheat	Fertilizer, Genetics	1990-91 / 1993-94
Boutahar, (1994)	1994	Effet des adventices et de la date de recolte sur les pertes a la recolte des cereals	Al awamia	Morocco	Grey	Wheat	The harvest day, Herbicide treatment	1990-1991
Tanji, (2002)	2002	Synthèse de 123 essais de désherbage chimique du blé tendre réalisés au Maroc entre 1948 et 2001	Al awamia	Morocco	Grey	Soft wheat	Chemical weeding	1948-2001
Savin et al., (2022)	2022	Intensifying cereal management in dryland Mediterranean agriculture: Rainfed wheat and barley responses to nitrogen fertilisation	Elsevier: European Journal of Agronomy	Spain	Peer review	Wheat and Barley	Fertilizer	2003-2008
Ryan et al., (1998)	1998	Potential for nitrogen fertilization and Hessian fly-resistance to improve Morocco’s dryland wheat yield	Elsevier: European Journal of Agronomy	Syria	Peer review	Wheat	Fertilizer, Hessian fly resistance	-
Epule et al., (2022)	2022	Identifying gaps in actual and simulated/potential yield and growing season precipitation in Morocco	Springer: Environmental Science and Pollution Research	Morocco	Peer review	Wheat, Barley, Maize	Rainfall	1991-2020
Marrou et al., (2021)	2021	Restrictive irrigation improves yield and reduces risk for faba bean across the Middle East and North Africa: A modeling study	Elsevier : Agricultural Systems	Morocco	Peer review	Faba Bean	Irrigation	2014-2018
Davis et al., (2017)	2017	Water limits to closing yield gaps	Elsevier: Advances in Water Resources	United States	Peer review	Maize, wheat, rice, soybeans	Water stress	1995-2005
Mrabet et al., (2012)	2012	Conservation agriculture in dry areas of Morocco	Elsevier: Field Crops Research	Morocco	Peer review	Wheat	No-tillage	4 to 13 years
Magnan et al., (2011b)	2011	The Quasi-Option Value of Delayed Input Use under Catastrophic Drought Risk: The Case of No-Till in Morocco	Oxford journals: American Journal of Agricultural Economics	United Kingdom	Peer review	Wheat	No-tillage	2006-2008
Giuliani et al., (2017)	2017	Realities, Perceptions, Challenges and Aspirations of Rural Youth in Dryland Agriculture in the Midelt Province, Morocco	MDPI: Sustainability	Switzerland	Peer review	All	Education, Water stress, Infrastructure and health	2016
Meliho et al., (2020)	2020	Impact of meteorological drought on agriculture in the Tensift watershed of Morocco	IWA Publishing: Journal of Water and Climate Change	Morocco	Peer review	Cereals and vegetables	Drought	1985-2014
Ryan et al. (1997)	1997	Nitrogen fertilization of durum wheat cultivars in the rainfed area of Morocco: Biomass, yield, and quality considerations	Springer: Cereal Research Communications	Morocco	Peer review	Durum Wheat	Fertilizer, Cultivars	1989-1990
Corbeels et al., (1999)	1999	Soil mineral nitrogen dynamics under bare fallow and wheat in vertisols of semi-arid Mediterranean Morocco	Springer: Biology and Fertility of Soils	Morocco	Peer review	Wheat	Fertilizer	1992-1995
Mrabet, (2011)	2011	Effects of Residue Management and Cropping Systems on Wheat Yield Stability in a Semiarid Mediterranean Clay Soil	Scientific Research: American Journal of Plant Sciences	Morocco	Peer review	Wheat	Conservation agriculture	1994-2003
Ryan et al., (1995)	1995	Impact of phosphorus fertiliser on barley, wheat and triticale in phosphorus deficient dryland zone soil	Al awamia	Morocco	Grey	Durum wheat, Bread wheat, Barley and triticale	Fertilizer, Hessian fly	-
Skees et al., (2001)	2001	Developing rainfall-based index insurance in Morocco	Policy research working paper	USA	Grey	Wheat, Barley and Maize	Rainfall, Insurance	1978-1999
Verner et al., (2018)	2018	Climate variability, drought, and drought management in Morocco’s agricultural sector	Word bank group	USA	Grey	Cereals (Wheat, barley and corn) legumes ( faba bean, lentils, peas, chickpea, peas and beans )	Rainfall, Heat waves, ENSO Events, Drought, Low education and lack of technology	1980-2016
Mohamed Badraoui and Rachid Dahanet, (2010)	2010	The green Morocco plan in relation to food security and climate change	Proceeding of an international conference in jordan	Morocco	Grey	Cereals, legumes	Rainfall, Temperature, Global warming, Supplemental irrigation, Planting date, Optimum seeds, Herbicides, Fertilizers, Conservation agriculture, Evapotranspiration	1997-2006
Mohammed Kharrou and osman abdalla	2010	Potential options for improving and stabilizing wheat yields in the context of climate change in west Asia and North africa	Proceeding of an international conference in jordan	Syria	Grey	Wheat	Supplemntal irrigation, No-tillage	-
et, (2010)
Hassine, (2007)	2007	Technical efficiency in the Mediterranean countries’ agricultural sector	Région et Développement n° 25	Tunisia	Peer review	Cereals ( wheat, barley, maize, rice), Fruits, Vegetables, Legumes ( beans, peas, chickpeas, lentil, vetches )	Rainfall, Technical Efficiency	1990-2005
L. El Ansaria,b, Y. Atnafe Yigezu, C. Garyd, H. Belhouchettea, (2015)	2015	Establishing farm typologies in dryland areas: the case of Saïs, Morocco.	ICARDA	France	Grey	Cereals ( wheat, barley, chickpea, faba bean) Vegetables ( potato and onion )	Irrigation, Labour, Fertilizer	2014
Aït El Mekki, (2006)	2006	Cereals policies in Morocco	CIHEAM analytic note	Morocco	Grey	Wheat, Barley, Maize	Rainfall, Legal status, Land fragmentation, Weed control	1980-2004
Karrou et al. (2008)	2008	Opportunities for improving wheat water productivity in semi-arid areas of Morocco	Al awamia	Morocco and Syria	Grey	Wheat	Planting date, Fertilizer, Supplemental irrigation,Weed control, No-tillage, Cultivars	1985-1999
Benabdelouahab et al., (2016)	2016	Testing Aquacrop to simulate DURUM WHEAT yield and schedule irrigation in a semi-arid irrigated perimetr in morocco	Wiley Online Library: Irrigation and drainage	Morocco	Peer review	Durum Wheat	Rainfall, Water stress,	2009-2012
Toumi et al., (2016)	2016	Performance assessment of AquaCrop model for estimating evapotranspiration, soil water content and grain yield of winter wheat in Tensift Al Haouz (Morocco): Application to irrigation management	Elsevier : Agricultural Water Management	Morocco	Peer review	Wheat	Irrigation, Seeding date	2002-2004
Moussadek et al., (2014)	2014	Tillage System Affects Soil Organic Carbon Storage and Quality in Central Morocco	Hindawi Publishing Corporation: Applied and Environmental Soil Science	Morocco	Peer review	Wheat	No-tillage	2006
Devkota and Yigezu, (2020)	2020	Explaining yield and gross margin gaps for sustainable intensification of the wheat-based systems in a Mediterranean climate	Elsevier: Agricultural Systems	Morocco	Peer review	Wheat	Rainfall, Fertilizer, Seed quality, Variety, Tillage method	2013-2014
Luc et al. (2005)	2005	Nematode parasites of cereals. Plant Parasitic Nematodes	CAB international (book name: Plant Parasitic Nematodes in Subtropical and Tropical Agriculture, 3rd Edition)	Turkey	Peer review	Wheat, Barley	Nematodes	-
Laasli et al., (2022)	2022	Biodiversity of Nematode Communities Associated with Wheat (Triticum aestivum L.) in Southern Morocco and Their Contribution as Soil Health Bioindicators	MDPI: Diversity	Morocco	Peer review	Wheat	Nematodes	2019-2020
Harmanny and Malek, (2019)	2019	Adaptations in irrigated agriculture in the Mediterranean region: an overview and spatial analysis of implemented strategies	Springer: Regional Environmental Change	The Netherlands	Peer review	All	Rainfall, Temperature, Solar radiation, Population density, Poverty, Road distance, Market accessibility, Knowledge	2007-2017
Yigezu and El-Shater, (2021)	2021	Socio-economic impacts of zero and reduced tillage in wheat fields of the Moroccan drylands	Wiley Online Library: Agricultural Economics	Egypt	Peer review	Wheat	No-tillage	2013-2014
Hakam et al., (2022)	2022	Modeling drought‑related yield losses using new geospatial technologies and machine learning approaches: case of the Gharb plain, North‑West Morocco	Springer: Modeling Earth Systems and Environment	Morocco	Peer review	Durum wheat, soft wheat and Barley	Rainfall, Temperature, Drought, Humidity,	2000-2020
Mokrini et al., (2009)	2009	Importance and distribution of the main cereal nematodes in Morocco BT - Cereal cyst nematodes: status, research and outlook	Proceeding of an international conference in ankara, turkey: CIMMYT	Morocco	Grey	Wheat,Barley,Oat	Nematodes	2007
Mokrini et al., (2018)	2018	Investigation of resistance to Pratylenchus penetrans and P. thornei in international wheat lines and its durability when inoculated together with the cereal cyst nematode Heterodera avenae, using qPCR for nematode quantification	Springer: European Journal of Plant Pathology	Morocco	Peer review	Wheat	Nematodes	-
Gharous and Boulal, (2016)	2016	IPNI North Africa Challenges in nutrient management under rainfed agriculture of Morocco	Elsevier: Procedia Engineering	Morocco	Peer review	Wheat	Fertilizer	-
Dimanche and Hoogmoed, (2002)	2002	Soil tillage and water infiltration in semi-arid Morocco: the role of surface and sub-surface soil conditions	Elsevier: Soil & Tillage Research	Belgium	Peer review	Wheat	Inefficient tillage systems	1994-1995
Hirich et al., (2021a)	2021	Introduction of alternative crops as a solution to groundwater and soil salinization in the Laayoune area, South Morocco	Springer Nature: Euro-Mediterranean Journal for Environmental Integration	Morocco	Peer review	Forage Corn, Alfalfa, Vegetables	Groundwater and soil salinity	2017
Qian et al., (2020)	2020	Risk assessment of the global crop loss in ENSO events	Elsevier: Physics and Chemistry of the Earth	China	Peer review	Wheat	ENSO events (El Nino/ La Nina)	2013-2017
Ichir et al., (2003)	2003	Effect of organic and mineral fertilizers on N-use by wheat under different irrigation frequencies	Elsevier: Plant biology and pathology	Morocco	Peer review	Wheat	Organic and Mineral fertilizer, Irrigation	1997-1998
Yousfi and Ezzahiri, (2001)	2001	Net blotch in semi-arid regions of Morocco II Yield and Yield-loss modeling	Elsevier: Field Crops Research	Morocco	Peer review	Barley	Net blotch	1995-1997
Hadri et al., (2021)	2021	Temporal trends in extreme temperature and precipitation events in an arid area: case of Chichaoua Mejjate region (Morocco)	IWA Publishing: Journal of Water and Climate Change	Morocco	Peer review	Durum wheat, soft wheat, barley	Rainfall, Temperature	2010-2015
Lougraimzi et al., (2019)	2019	Potential effect of natural products in the management of seed infestation of cereals during storage	Faculty of biotechnology and food sciences: Journal of Microbiology, Biotechnology and Food Sciences	Morocco	Peer review	Wheat	Pests	2013
Fornage, (2006)	2006	Maroc, zone du moyen-sebou : des agriculteurs au croisement des contraintes locales et des enjeux de la globalisation	Cairn.info: Afrique contemporaine	France	Grey	Wheat, Barley, Maize	Pollution of irrigated water, Poverty, Literacy, Liberalization	1998-2004
Lionboui et al., (2019)	2019	Dynamic Agro-Economic Modeling for Sustainable Water Resources Management in Arid and Semi-arid Areas	Springer: Handbook of Environmental Materials Management	Morocco	Peer review	Cereals	Rainfall, Irrigation	2005-2014
Corbeels et al., (1998)	1998	Analysis of water use by wheat grown on a cracking clay soil in a semi-arid Mediterranean environment: weather and nitrogen effects	Elsevier: Agricultural Water Management	Morocco	Peer review	Wheat	Rainfall, Fertilizer, Soil evaporation	1993-1995
Amine et al., (2022)	2022	Integrating Sowing Date with Chickpea Genotypes in Managing Fusarium Wilt in Morocco	MDPI: Agriculture	Morocco	Peer review	Chickpea	Sowing date, Cultivars, Diseases	2017-2019
Doukkali, (2006)	2006	Évolution des performances du secteur agricole : résultats d’une expérience	Haut-commissariat au plan	Morocco	Grey	Cereals (wheat, barley, maize), legumes and sunflower	Rainfall, Technical Efficiency	1991-2002
Bregaglio et al., (2015)	2015	New multi-model approach gives good estimations of wheat yield under semi-arid climate in Morocco	Springer: Agronomy for Sustainable Development	Italy	Peer review	Wheat	Drought	2011-2012
Bishaw et al., (2019)	2019	Political Economy of the Wheat Sector in Morocco: Seed Systems, Varietal Adoption, and Impacts	International Center for Agricultural Research in the Dry Areas (ICARDA)	Lebanon	Grey	Wheat	Variety, Technical efficiency	1960-2016
El Mouttaqi et al., (2022)	2022	How Does Organic Amendment and NPK Fertilization Improve Forage Yield of Cereals under Salinity and Arid Conditions? Case of Moroccan Sahara	MDPI: Environmental sciences proceedings	Morocco	Peer review	Barley, Oat, Triticale, forage corn, Sorghum	Organic amendments, Fertilizer	2020-2021
El Hamdi et al., (2022)	2022	Sources of spatial variability of soil salinity: the case of Beni Amir irrigated command areas in the Tadla Plain, Morocco	Taylor & Francis Group: Arid land research and management	France	Peer review	Wheat, olive, sugar beet, alfalfa, carrots	water depletion, Soil salinity	2003-2019
Karrou and Oweis, (2014)	2014	Assessment of the severity and impact of drought spells on rainfed cereals in Morocco	Academic Journals: African Journal of Agricultural Research	Morocco	Peer review	Durum wheat, bread wheat and Barley	Rainfall	1988-2008
El Mourid and Karrou, (1996)	1996	Agriculture in arid and semi-arid regions of Morocco: Challenges and Prospects	Al Awamia	Morocco	Grey	Cereals	Rainfall, Temperature, Water shortage, Shallow eroded soils, Lack of infrastructure, Literacy	-
Taaime et al., (2022)	2022	Early Sowing of Quinoa to Enhance Water Use Efficiency and Yield under Arid Conditions in Morocco	MDPI: Environmental sciences proceedings	Morocco	Peer review	Quinoa	Sowing date	2020-2021
Assem et al., (2017)	2017	Impact of water stress on the leaf tissues of two Moroccan varieties of durum wheat (Triticum durum Desf)	Journal of Materials and Environmental Sciences	Morocco.	Peer review	Durum wheat	Drought, Water stress	-
Balaghi et al., (2013)	2013	Agrometeorological cereal yield forecasting in Morocco	International Journal of Water Resources Development	Morocco	Grey	Durum wheat, soft wheat and Barley	Rainfall, Soil Degradation, Pests, Diseases, Fertilizer, Technical efficiency	1988-2011
Mamassi et al., (2022)	2022	Relevance of soil fertility spatial databases for parameterizing APSIM-wheat crop model in Moroccan rainfed areas	Springer: Agronomy for Sustainable Development	Morocco	Peer review	Wheat	Soil fertility	2018-2020
Temani et al., (2021)	2021	Olive agroforestry can improve land productivity even under low water availability in the South Mediterranean	Elsevier: Agriculture, Ecosystems and Environment	France	Peer review	Durum Wheat and Faba Bean	Agroforestry	2017-2019
Dewenam et al., (2021)	2021	Performance Evaluation of the WOFOST Model for Estimating Evapotranspiration, Soil Water Content, Grain Yield and Total Above-Ground Biomass of Winter Wheat in Tensift Al Haouz (Morocco): Application to Yield Gap Estimation	MDPI: Agronomy	Morocco	Peer review	Winter Wheat	Crop cycle management, Water and fertilization supply levels	2002-2004
Hadria et al., (2006)	2006	Monitoring of irrigated wheat in a semi-arid climate using crop modelling and remote sensing data: Impact of satellite revisit time frequency	Taylor & Francis Group: International Journal of Remote Sensing	Morocco	Peer review	Wheat	Temperature, Water stress	2003
Devkota et al., (2022)	2022	Conservation agriculture improves agronomic, economic, and soil fertility indicators for a clay soil in a rainfed Mediterranean climate in Morocco	Elsevier: Agricultural systems	Morocco	Peer review	Wheat, Barley, Chickpea, Lentil	Conservation agriculture	2014-2019
Amassaghrou et al., (2021)	2021	Productivité et efficience des systèmes agroforestiers à base d’oliviers au Maroc : cas de Moulay Driss Zerhoun	EDP Sciences: Cahiers Agricultures	Morocco	Grey	Cereals (wheat and barley) Legumes (faba bean and chickpea)	Agroforestry	2011-2014
Daoui et al., (2014)	2014	Agroforestry Systems in Morocco: The Case of Olive Tree and Annual Crops Association in Saïs Region	Springer: Science, Policy and Politics of Modern Agricultural System	Morocco	Peer review	Olive with Cereals (wheat, barley and maize) Legumes( faba bean, chickpea, pea and beans) Vegetables ( potato and onions)	Agroforestry	2008
Kallida et al., (2021)	2021	Biomass production of different annual cereal-legume intercrops under Moroccan conditions	CIHEAM : Options Méditerranéennes	Morocco	Grey	Oat, triticale, Barley, Rye, Fodder pea, Vetch	Cereal-Legume intercrops	Two years
Mouradi et al., (2018)	2018	Effect of faba bean (Vicia faba L.) rhizobia symbiosis on barley's growth, phosphorus uptake and acid phosphatase activity in the intercropping system	Elsevier: Annals of Agrarian Science	Morocco	Peer review	Barley, Faba Bean	Cereal-Legume intercrops	-
Lazali et al., (2021)	2021	CROSYMED Project: Enhancing Nutrient Use Efficiency through Legumes in Agroecosystems of the Mediterranean Basin	MDPI : Sustainability	Algeria	Peer review	Chickpea with durum wheat	Cereal-Legume intercrops	-
Wahbi, (2016)	2021	Influence des cultures associées fève/blé sur le potentiel mycorhizien des sols et la structure de la microflore mycorhizosphérique. Conséquences sur la productivité des agrosystèmes au Maroc.	HAL : Open science	Morocco	Grey	Faba bean, Durum Wheat	Cereal-Legume intercrops	2011-2013
Abderrazzak et al., (2018)	2018	Optimization of the technical management of agroforestry (cereal species and nitrogen fertilization) in olive groves	Conference AMAS Conference IV	Morocco	Grey	Olive with Durum and Bread Wheat	Agroforestry	12 years
Bajeddi, (2000)	2000	Evolution de la politique de développement agricole et analyse des contraintes au Maroc	Consultant National Principal	Morocco	Grey	Cereals and legumes	Rainfall, Poverty, Literacy, Qualification of farmers, Irrigation	-
Yousfi and Ezzahiri, (2001)	2001	Net blotch in semi-arid regions of Morocco. I Epidemiology	Elsevier : Field Crops Research	Morocco	Peer review	Barley	Net blotch	1995-1997
Nsarellah et al. (2011)	2011	Adaptation of Moroccan durum wheat varieties from different breeding eras	Academic journals: Journal of Plant Breeding and Crop Science	Morocco	Peer review	Wheat	Environnemental and genotype factors	2001-2005
Hirich et al., (2021)	2021	Development of Quinoa Value Chain to Improve Food and Nutritional Security in Rural Communities in Rehamna, Morocco: Lessons Learned and Perspectives	MDPI: Plants	Morocco	Peer review	Quinoa	Drought, Salinity	2018
Bonzanigo et al., (2016)	2016	Conditions for the adoption of conservation agriculture in Central Morocco: an approach based on Bayesian network modelling	Italian Journal of Agronomy	Italy	Peer review	Wheat and legumes	Conservation agriculture	2019-2021
Badraoui, (1998)	1998	Variation de la qualité des sols : une base pour évaluer la durabilité de la mise en valeur agricole sous irrigation par pivot au Maroc	Revue : Étude et Gestion des Sols	Morocco	Grey	Wheat	Salinity, Irrigation	-
Bouzoubaâ et al., (2009)	2009	Le Silicium ; le levier minéral indispensable pour une agriculture durable au Maroc	Symposium international « Agriculture durable en région Méditerranéenne (AGDUMED)	Morocco	Grey	Wheat	Fertilizer, salinity	2004-2008
Achli et al., (2022)	2022	Vulnerability of Barley, Maize, and Wheat Yields to Variations in Growing Season Precipitation in Morocco	MDPI: Applied Science	Morocco	Peer review	Wheat, Barley and Maize	Rainfall, Poverty, Literacy	1991-2020
Baruth et al., (2014)	2014	Crop Monitoring in Morocco Special issue with NEAR-AVERAGE YIELDS FOR WINTER CROPS DUE TO DELAYED SOWING	MARS Agrometeorological Bulletin	Morocco	Grey	Wheat and Barley	Rainfall, Temperature, Pests, Diseases	2009-2010
Yigezu et al., (2021a)	2021	Institutional and farm-level challenges limiting the diffusion of new varieties from public and CGIAR centers: The case of wheat in Morocco	Springer: Food Security	Egypt	Peer review	Wheat	Institutional and farm-level challenges	2012-2013
Guy Jobbins, Jack Kalpakian, Abdelouahid Chriyaa, (2020)	2020	To what end? Drip irrigation and the water-energy-food nexus in Morocco	Taylor & Francis Group: The International Journal of Water Resources Development	United Kingdom	Peer review	All	Irrigation	-
Irhza et al., (2023)	2023	Description of the Gap between Local Agricultural Practices and Agroecological Soil Management Tools in Zerhoun and in the Middle Atlas Areas of Morocco	MDPI: Land	Morocco	Peer review	Olive, vegetables, cereals and legumes	Rainfall, Irrigation, Fertilizer, Intercropping, Labour and Land size, Rotation	2020-2021
Bipasha Baruah and Dina Najjar, (2022)	2022	Gender Equality, Climate Change and Agriculture in the MENA region: Priorities and Possibilities. Beirut,	ICARDA	Morocco	Grey	All	Gender equity, Poverty	-
